# Supplementary material for: Neurotropism and Encephalitis of a Novel Pegivirus with Experimental Evidence Across Avian Species
Source: Research Square preprint supplement (doi:10.21203/rs.3.rs-6888535/v1), 2025-07-07
Supplement: Supplementary file 1 [file 165d85f60d1e37dd396529e6.xlsx]

## Sheet: NS3-distance
Supplementary Table 2. Percent amino acid identity matrix for the NS3 region (544 amino acids) among partridge pegivirus strains and related avian-origin pegiviruses. Pairwise identities were calculated using uncorrected pairwise distances and global gap removal. Lower left values represent % identity. The matrix highlights 97.98% amino acid identity between ParPgV-A and ParPgV-C, and 59.38–77.39…
Number of sequences:	29
Lower left values:	%Identity
Distance metric:	Uncorrected Pairwise Distance
Gap treatment:	Global gap removal
Residues considered:	544
	ParPgV-C	ParPgV-A	WPR17472_Fernbird_pegivirus_1	QUE43477_Goose_pegivirus_1_GPgV-1	QVG71836_Leucosticte brandti pegivirus	QVG71835_Passer montanus pegivirus	UCJ00138_Pin virus	QUE43478_Goose pegivirus-2 GPgV-2	QVG71838_Montifringilla taczanowskii pegivirus	ANO81671_Porcine pegivirus PPgV	AZY88695_Dolphin pegivirus DPgV	AAA96964_Pegivirus hominis genotype 2 HPgV-gt2	QKY59672_Human pegivirus genotype 1 HPgV-gt1	AHH32934_Simian pegivirus SPgVkrc_RC29	AHH32962_Simian pegivirus SPgVkob_OB23	QOI90119_Southwest bike trail virus-2 SOBV-2	T08839_Marmoset hepatitis GB Virus A	AAC55983_Pegivirus platyrrhini_SPgV-A	AGK41011_Bat pegivirus PDB-737B BPgV	AGK41019_Bat pegivirus PDB-491.2 BPgV	AGI04301_Pegivirus caballi_EPgV	AGH70217_Pegivirus equi_TDAV	AGK41018_Pegivirus sturnirae_BPgV-I	AEA73241_Bat GB-like virus JFD-2011	ADK12629_Pegivirus pteropi_GB virus-D	ALE27082_Pegivirus columbiaense_HHPgV	AGK41006_Pegivirus scotophili_BPgV-G	AGK41010_Pegivirus carolliae_BPgV-F	AGJ71780_Pegivirus neotomae_RPgV
ParPgV-C
ParPgV-A	97.9779
WPR17472_Fernbird_pegivirus_1	76.8382	76.1029
QUE43477_Goose_pegivirus_1_GPgV-1	60.2941	59.375	61.7647
QVG71836_Leucosticte brandti pegivirus	67.4632	66.9118	65.9926	60.6618
QVG71835_Passer montanus pegivirus	67.6471	66.9118	65.9926	60.6618	85.8456
UCJ00138_Pin virus	75.9191	75.3676	84.0074	62.1324	66.7279	65.0735
QUE43478_Goose pegivirus-2 GPgV-2	77.3897	76.8382	83.2721	62.5	67.4632	66.9118	86.0294
QVG71838_Montifringilla taczanowskii pegivirus	76.1029	75.5515	80.8824	62.3162	68.9338	67.6471	83.2721	84.5588
ANO81671_Porcine pegivirus PPgV	50	49.0809	48.8971	51.8382	49.2647	49.8162	49.0809	49.4485	50.1838
AZY88695_Dolphin pegivirus DPgV	50.7353	50.3676	49.8162	53.3088	50.3676	50.7353	49.4485	49.4485	50.3676	55.6985
AAA96964_Pegivirus hominis genotype 2 HPgV-gt2	48.5294	47.7941	50.1838	51.4706	52.3897	51.2868	48.8971	48.8971	49.6324	56.0662	54.9632
QKY59672_Human pegivirus genotype 1 HPgV-gt1	48.3456	47.6103	50.3676	51.6544	52.5735	51.6544	48.8971	48.8971	49.6324	56.4338	54.9632	98.8971
AHH32934_Simian pegivirus SPgVkrc_RC29	48.1618	47.6103	50	52.3897	51.2868	49.6324	50	49.4485	49.8162	58.2721	55.8824	82.5368	82.5368
AHH32962_Simian pegivirus SPgVkob_OB23	48.1618	47.6103	50	52.2059	50.7353	49.0809	49.2647	48.8971	50.1838	56.8015	54.7794	84.0074	83.8235	90.4412
QOI90119_Southwest bike trail virus-2 SOBV-2	49.8162	49.0809	50.9191	54.2279	52.3897	53.8603	50.3676	51.6544	51.2868	54.0441	54.4118	67.2794	67.6471	67.8309	66.7279
T08839_Marmoset hepatitis GB Virus A	50.1838	49.6324	50.3676	52.0221	50.3676	51.4706	49.8162	50.7353	50.5515	55.5147	54.9632	66.5441	66.5441	68.3824	68.9338	75.1838
AAC55983_Pegivirus platyrrhini_SPgV-A	49.6324	49.0809	49.2647	52.2059	50.9191	50	49.4485	49.6324	50.7353	53.3088	53.3088	67.4632	67.6471	67.6471	68.9338	73.7132	82.3529
AGK41011_Bat pegivirus PDB-737B BPgV	50.5515	49.6324	51.1029	53.6765	51.4706	52.7574	50.5515	51.1029	52.7574	56.4338	54.4118	68.3824	68.3824	68.3824	68.9338	75.5515	78.3088	76.6544
AGK41019_Bat pegivirus PDB-491.2 BPgV	48.8971	48.1618	51.2868	53.3088	52.0221	51.6544	49.4485	50.5515	52.2059	55.8824	55.1471	69.3015	69.6691	69.4853	70.0368	73.7132	76.4706	77.5735	84.375
AGI04301_Pegivirus caballi_EPgV	49.4485	49.0809	49.4485	54.9632	49.0809	50.1838	49.0809	50	51.6544	56.6176	57.3529	55.3309	55.1471	55.5147	54.2279	54.5956	54.2279	52.9412	56.25	56.25
AGH70217_Pegivirus equi_TDAV	49.2647	48.8971	49.6324	54.9632	49.2647	50.5515	48.3456	50.5515	50.7353	57.5368	57.5368	54.5956	54.4118	56.4338	54.9632	54.0441	54.0441	53.125	54.2279	54.9632	63.0515
AGK41018_Pegivirus sturnirae_BPgV-I	51.8382	50.7353	50	54.5956	49.2647	49.2647	50.3676	50.9191	50.7353	58.0882	55.6985	57.7206	57.7206	59.0074	59.9265	61.5809	61.0294	59.5588	60.1103	59.9265	56.25	57.1691
AEA73241_Bat GB-like virus JFD-2011	49.0809	48.1618	48.1618	52.0221	50.1838	50.7353	48.7132	49.2647	49.0809	58.8235	54.9632	58.6397	58.2721	60.2941	60.1103	57.7206	58.8235	56.4338	59.7426	59.1912	57.1691	57.1691	60.2941
ADK12629_Pegivirus pteropi_GB virus-D	48.7132	47.9779	48.3456	53.125	49.6324	50.1838	48.8971	48.8971	48.5294	59.9265	56.9853	60.1103	59.7426	62.1324	60.6618	59.9265	58.2721	56.8015	61.0294	60.8456	59.1912	57.7206	63.0515	76.4706
ALE27082_Pegivirus columbiaense_HHPgV	42.4632	41.9118	41.5441	42.4632	42.8309	42.6471	40.4412	42.0956	43.1985	41.7279	43.0147	45.5882	45.2206	45.4044	46.875	42.2794	43.0147	41.7279	43.75	43.3824	42.2794	42.0956	44.6691	41.9118	43.1985
AGK41006_Pegivirus scotophili_BPgV-G	46.1397	45.5882	47.2426	50.1838	46.6912	46.875	48.3456	46.6912	48.5294	47.7941	48.3456	47.7941	47.7941	47.4265	46.875	48.8971	47.2426	47.7941	50.7353	49.8162	51.8382	47.7941	47.7941	46.6912	48.1618	48.1618
AGK41010_Pegivirus carolliae_BPgV-F	47.4265	46.6912	47.6103	49.6324	47.0588	47.2426	47.9779	48.5294	49.8162	49.6324	46.875	49.8162	49.8162	49.4485	50.3676	49.6324	48.8971	48.1618	50.7353	49.4485	51.1029	48.5294	47.6103	47.9779	49.8162	47.9779	64.8897
AGJ71780_Pegivirus neotomae_RPgV	45.0368	44.3015	46.1397	50.5515	48.5294	47.2426	47.2426	46.5074	47.4265	48.8971	48.1618	50.3676	49.8162	50.9191	51.1029	50.1838	47.6103	48.8971	51.2868	51.2868	50.5515	50.7353	49.2647	48.3456	51.1029	47.4265	63.0515	63.4191
