# Supplementary material for: Neurotropism and Encephalitis of a Novel Pegivirus with Experimental Evidence Across Avian Species
Source: Research Square preprint supplement (doi:10.21203/rs.3.rs-6888535/v1), 2025-07-07
Supplement: Supplementary file 2 [file b6524f3532005fd7034e17e8.docx]

**Supplementary Table 3.** Detection of ParPgV negative-strand RNA in tissues from experimentally inoculated birds and embryonated eggs.

|  | **Brain** | **Liver** | **Kidney** | **Spleen** | **Bone Marrow** | **Cecal Tonsil** | **Embryo** | **Yolk Sac** | **Allantoic Fluid** |
| --- | --- | --- | --- | --- | --- | --- | --- | --- | --- |
| Red-legged partridge (RLP-VG) | + | -1 | + | -1 | -1 | + | n.a. | n.a. | n.a. |
| Red-legged partridge (RLP-CG) | + | - | + | - | - | - | n.a. | n.a. | n.a. |
| Grey partridge (GP) | + | n.d. | n.d. | n.d. | n.d. | n.d. | n.a. | n.a. | n.a. |
| SPF Chicken (SPF) | n.d.2 | + | + | + | + | + | n.a. | n.a. | n.a. |
| Embryonated eggs | n.a. | n.a. | n.a. | n.a. | n.a. | n.a. | + | + | -1 |

*Abbreviations: +, positive; -, negative; n.a., not applicable; n.d., not done.*

*Footnotes: 1 inconclusive; 2 not done due to low viral load.*
