# Supplementary material for: Neurotropism and Encephalitis of a Novel Pegivirus with Experimental Evidence Across Avian Species
Source: Research Square preprint supplement (doi:10.21203/rs.3.rs-6888535/v1), 2025-07-07
Supplement: Supplementary file 3 [file ec0a5827e8590d4787959eda.xlsx]

## Sheet: Primers and probes
Supplementary Table 1. List of primers, probes, and PCR cycling conditions used for the amplification and detection of partridge pegivirus (ParPgV).
							PCR cycling
Assay	Primer/Probe name1	Sequence (5'-3')	Position on ParPgV genome	Ta2	Product length	RT3	Initial denaturation	cycling conditions	final elongation
genome amplification PCR (ParPgV-A)	Pegi_5.1kb-F (#2253)	TGA CCC CAC CCC AGA CCT C	277:295 (ParPgV-A)	60°C	4.928kb	n.a.4	94°C for 3 min	30x 94°C 30s, Ta (Table S1) 30 s, 65°C 50s/1kb PCR product	65°C for 10 min
	Pegi_5.1kb-R (#2254)	CCA GGC ACC CGG TGT AGT TC	5223:5204 (ParPgV-A)
genome amplification PCR (ParPgV-A)	Pegi260-F (#2208)	GCGGCTTTGGTGAACTACAC	5193:5212 (ParPgV-A)	60°C	4.129kb
	Pegi814bp-R (#2202)	TCACACTCCTCGCAGACGATGAGGCA	9346:9321 (ParPgV-A)
Pegivirus screening conventional PCR	Pegi150bp-F (#2205)	TGCACAGTGCTTATAAACTCAG	51:72 (ParPgV-A) / 288:309 (ParPgV-C)	55°C	150bp	50°C for 30 min	95 for 15 min	35X 95°C 30s, Ta (Table S1) 30 s, 72°C 1 min	72°C for 10 min
	Pegi150bp-R (#2206)	GTTCTAACCTTACAGCGCC	181:199 (ParPgV-A) / 437:419 (ParPgV-C)
Pegivirus screening conventional PCR	Pegi260-F (#2208)	GCGGCTTTGGTGAACTACAC	5193:5212 (ParPgV-A) / 5429:5448 (ParPgV-C)	59°C	260bp
	Pegi260-R (#2207)	AGCATCCAAGACTCCTTGGC	5452:5433 (ParPgV-A) / 5688:5669 (ParPgV-C)
Pegivirus screening real-time PCR (5'-UTR real-time RT-PCR)	ParPgV_5UTR-F (#2342)	AGT GCT TAT AAA CTC AGT ACC CTG G	56:80 (ParPgV-A) / 293:317 (ParPgV-C)	n.a.	n.a.	50°C for 15 min	95°C for 3 min	40x 95°C for 5s, 60°C for 20s	n.a.
	ParPgV/A_NS3-R (#2343)	GAT GCT TTG TCA AAT CGC GGA TAG	172:149 (ParPgV-A) / 409:386 (ParPgV-C)
	ParPgV_5UTR-P (#2344)	5'-FAM-TTC CCC AAG GCG GCA ACG GGC TAG GC-BHQ1-3'	85:110 (ParPgV-A) / 322:347 (ParPgV-C)
genome amplification PCR	Pegi814bp-F (#2201)	GGATTTCGACTGTGACGAGGGAGCAGG	8533:8559 (ParPgV-A)	61°C	814bp	n.a.	94°C for 3 min	30x 94°C 30s, Ta (Table S1) 30 s, 65°C 50s/1kb PCR product	65°C for 10 min
	Pegi814bp-R (#2202)	TCACACTCCTCGCAGACGATGAGGCA	9346:9321 (ParPgV-A)
genome amplification PCR	Pegi_3'_1.2kb-F (#2255)	GGC TCA TGG TCA ACC CGA AAG G	9153:9174 (ParPgV-A)	60°C	976bp
	Pegi_3'_1.2kb-R (#2256)	TAG AGT TTT CGC CGG TTC GCC	10148:10128 (ParPgV-A)
SISPA	SISPA	GTTGGAGCTCTGCAGTC	not applicable		not applicable	n.a.	94°C for 3 min	30x 94°C 30s, 55°C 30s, 65°C 5 min	65°C for 10 min
SISPA	SISPA-N	GTTGGAGCTCTGCAGTCATCNNNNNN	not applicable		not applicable	25°C 10 min, 42°C 1h	n.a	n.a.	n.a.
genome amplification PCR (ParPgV-C)	PegiC_Nterm-884bp-F1 (#2406)	CAGTCTTCAGGGTTTTCGTG	553:572 (ParPgV-C)	57°C	884bp	n.a.	94°C 3 min	30x 94°C 30s, Ta (Table S1) 30 s, 65°C 50s/1kb PCR product	65°C 10 min
	PegiC_Nterm-884bp-R1 (#2407)	AGTAGCCCGATTAGTGTATTCC	1528:1507 (ParPgV-C)
genome amplification PCR (ParPgV-C)	PegiC_6424-F (#2414)	CACTTTTGCACTGCCAATC	6426:6444 (ParPgV-C)	58°C	835bp
	PegiC_7260-R (#2415)	GGTGTCAGTGGTAACCTTTC	7260:7241 (ParPgV-C)
genome amplification PCR (ParPgV-C)	PegiC_7076-F (#2416)	GTGGAGTCTCCCGTGATATG	7076:7095 (ParPgV-C)	58°C	850bp
	PegiC_7925-R (#2417)	CCCACACTTTCTCTAGGTCG	7925:7906 (ParPgV-C)
genome amplification PCR (ParPgV-C)	PegiC_7705-F (#2418)	ACTCATGACGTACAAAGCAG	7705:7724 (ParPgV-C)	58°C	948bp
	PegiC_8652-R (#2419)	ACTCCACTCCAGATGTAGC	8652:8634 (ParPgV-C)
genome amplification PCR (ParPgV-C)	PegiC_9389-F (#2420)	CTCATGGTCAACCCGAAAG	9389:9407 (ParPgV-C)	58°C	994bp
	PegiC_10382-R (#2421)	CCACGGCGTACTTGTATTC	10382:10364 (ParPgV-C)
sequencing primer (ParPgV-A)	Pegi-5kb-819F	TGGACTTCTTTGTCGGCTTG	2083:2102 (ParPgV-A)	n.a.	n. a.	n.a.	n.a.	n.a.	n.a
sequencing primer (ParPgV-A)	Pegi-5kb-C-term-238R	CTGAACACAGGTGCCAAAAG	3410:3391 (ParPgV-A)	n.a.	n. a.	n.a.	n.a.	n.a.	n.a
sequencing primer (ParPgV-C)	PegiC_NS3-F	CCACACTGAAATCAGATGGG	6288:6307 (ParPgV-C)	n.a.	n. a.	n.a.	n.a.	n.a.	n.a
sequencing primer (ParPgV-C)	PegiC_NS5A	ACCGTTGGACTTTATCCTGC	8872:8853 (ParPgV-C)	n.a.	n. a.	n.a.	n.a.	n.a.	n.a
sequencing primer	PegiA+C_NS5A-F	CCTATCAACGTGCTGCACAC	7065:7084 (ParPgV-A) /7302:7321 (ParPgV-C)	n.a.	n. a.	n.a.	n.a.	n.a.	n.a
sequencing primer (ParPgV-C)	PegiC_NS5A-2R	CTAAGTCGTTCTCATCAACGC	7913:7893 (ParPgV-C)	n.a.	n. a.	n.a.	n.a.	n.a.	n.a
sequencing primer	NS4B-F	TCATTGACTGGGCGTTAAGC	6136:6155	n.a.	n. a.	n.a.	n.a.	n.a.	n.a
sequencing primer	NS4B-R	GTTGACACCTTACACAGTGGA		n.a.	n. a.	n.a.	n.a.	n.a.	n.a
Gibson assembly cloning of patial Pegi_A_E2 into pFastBac HT-A (Baculovirus Expression system)	Pegi_A_E2_fwd	acctgtattttcagggcgccGTGCACACTTGCGTGGTAG	1548:1566 (ParPgV-A)	63°C	474bp	n.a.	98°C 1 min	35x 98°C 10s, 63°C 30s, 72°C 35s	72°C 2min
	Pegi_A_E2_rev	ctttgaattccggatccatTCTGTTGATGTGAACGAGC	2003:2021 (ParPgV-A)
	pFastBacHT-A_fwd	atg gat ccg gaa ttc aaa g	not applicable	60°C	4856bp			35x 98°C 10s, 60°C 30s, 72°C 2.5 min
	pFastBacHT-A_rev	ggc gcc ctg aaa ata cag	not applicable
	PegiC260_negStrand_tag_RT	ACT GAT CGT GGA CTG GCC TTA GTG AAC TAC AC	5432:5448	n.a.	n.a.	37°C 1h	n.a.	n.a.	n.a.
negative RNA strand assay	TagPrimer_LNA_neg_strand	AC(T)GA(T)CG(T)G(G)ACTG	not applicable	50°C	257bp	n.a.	95°C 15 min	40x 94°C 30s, 50°C 30s, 72°C 1 min	72°C 10 min
	PegiC260_negStrand_R	AGCATCCATGACTCCTTG	5688:5671 (ParPgV-C)
	PegiC_260_posStrand_tag_RT	ACG TGC ATC GAC ATG GTT ATT GCA CTA GCC CAA	5730:5713 (ParPgV-C)	n.a.	n.a.	37°C 1h	n.a.	n.a.	n.a.
positive RNA strand assay	TagPrimer_LNA_pos_strand	ACG(T)GCA(T)CG(A)C(A)TG	not applicable	50°C	310bp	n.a.	95°C 15 min	40x 94°C 30s, 50°C 30s, 72°C 1 min	72°C 10 min
	PegiC_260_posStrand_R	TAG TGA ACT ACA CCG GTT G	5436:5454 (ParPgv-C)
Footnotes: 1 F/fwd - Foward; R/rev - Reverse; P - Probe; # - guiding number for Supplementary Fig. 1. 2 Ta - Annealing Temperature. 3 RT- Reverse Transcription; 4 - n.a. Not Applicable.
